# Supplementary material for: Renilla luciferase-labeled Annexin V: a new probe for detection of apoptotic cells
Source: Royal Society of Chemistry journal article supplement (doi:10.1039/c2an35741k), 2012-01-01
Supplement: c2an35741k.pdf [file c2an35741k.pdf]

## Supplementary data information

### Renilla luciferase-labeled Annexin V: a new probe for detection of apoptotic cells

Mahboobeh Nazari<sup>1</sup>, Rahman Emamzadeh<sup>2\*</sup>, Saman Hosseinkhani<sup>3</sup>, Luca Cevenini<sup>4</sup>, Elisa Michelini<sup>4</sup> and Aldo Roda<sup>4</sup>

<sup>1</sup>Department of Recombinant Technology Research, Nanobiotechnology Research Center, Avicenna Research Institute, ACECR, Tehran, Iran.

<sup>2</sup>Department of Biology, Faculty of Biological Sciences, *University of Isfahan*, Isfahan, Iran.

<sup>3</sup>Department of Biochemistry, Faculty of Biological Sciences, Tarbiat Modares University, Tehran, Iran

<sup>4</sup>Department of Pharmaceutical Sciences, University of Bologna, Bologna, Italy.

\*Address correspondence to: Rahman Emamzadeh, Department of Biology, Faculty of Science, *University of Isfahan*, Isfahan, Iran

Tel: +98 311 7932174; Fax: +98 311 6682910; E-mail: (Sci\_rahman@yahoo.com; r.emamzadeh@sci.ui.ac.ir)

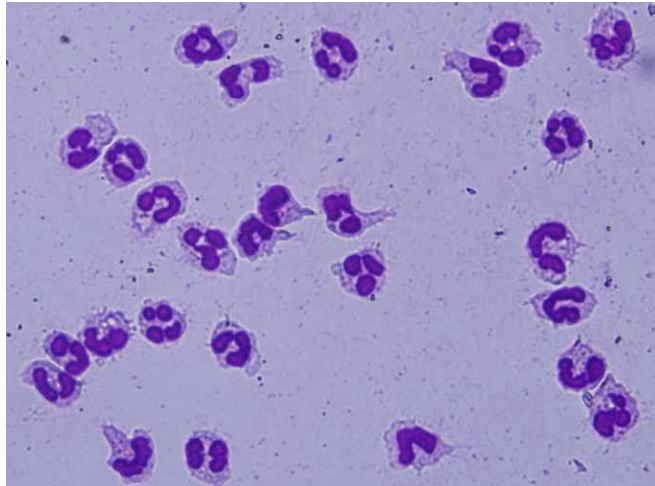

**Supplementary Figure 1.** Morphologic features of neutrophils stained with Giemsa. Neutrophils were obtained from fresh human blood by dextran sedimentation and Ficoll-Hypaque centrifugation, followed by hypotonic lysis of residual erythrocytes. May-Grunwald-Giemsa staining showed that the final cell preparation contained more than 99% neutrophils.

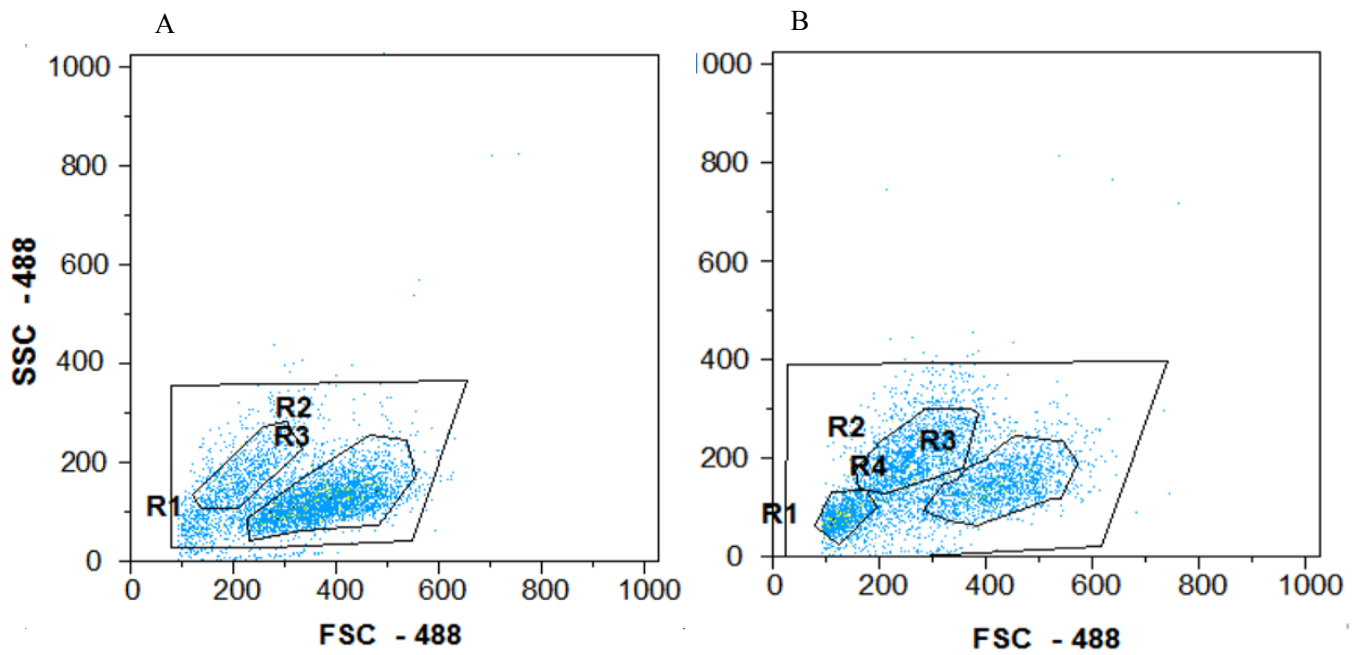

**Supplementary Figure 2.** Dot plots of PI staining on viable versus apoptotic neutrophils. Cells were incubated at 37 °C for 22 (a) and 48 (B) hours. The total (gate R1), apoptotic (gate R2), and viable cells (gate R3) from the flow cytometry represented by the blue dots. The cell population in gate R2 increased, while the number of cells in gate R3 decreased significantly. A new population of cells (gate 4) can be detected after 48h. It may show late apoptotic or necrotic cells. However its nature is difficult to precisely define.

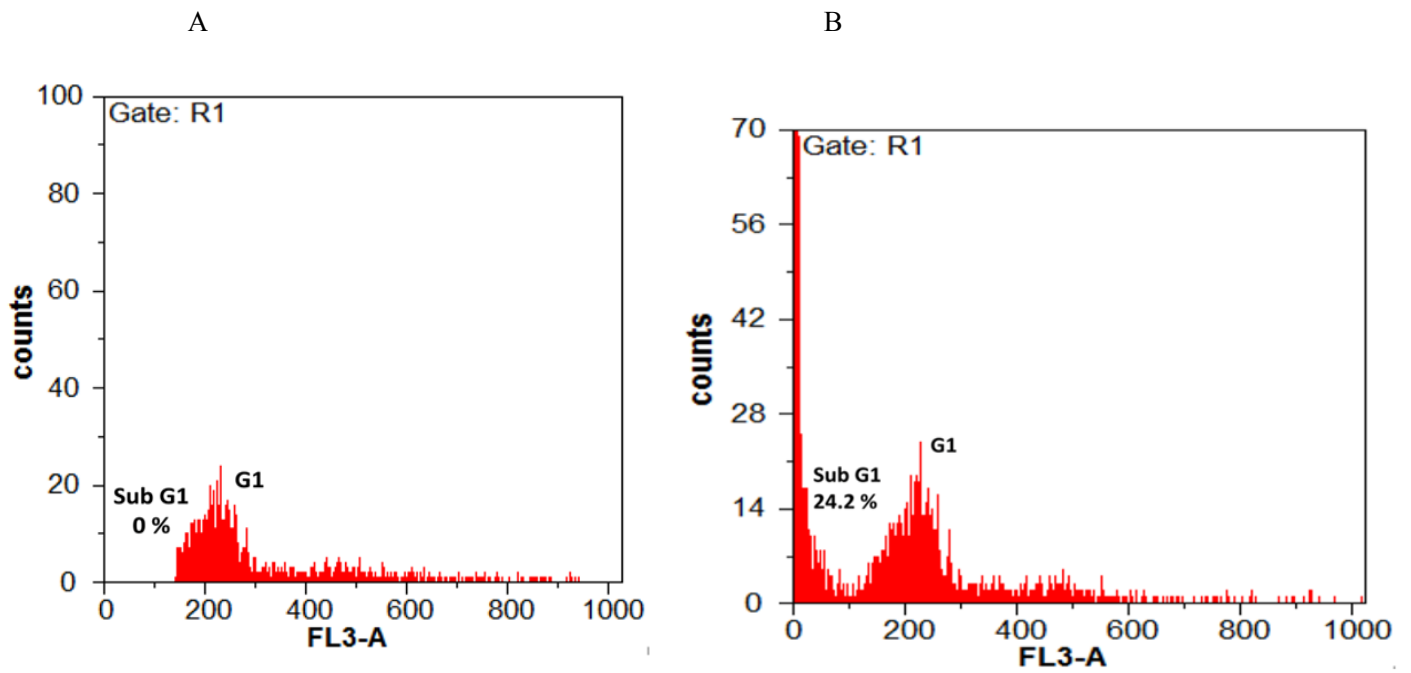

**Supplementary Figure 3.** Sub-G1 analysis of neutrophils. The analysis was carried out with freshly isolated cells (a) and incubated neutrophils after 22 h (b). The results show that the percentage of neutrophils in the sub-G1 phase significantly increased after 22 h. Interestingly, mature polymorphonuclear neutrophils are in resting phase and do not show G2/M.
